# Supplementary material
Source: publisher figshare collection journal article supplement (https://asha.figshare.com/articles/dataset/_/28108139)
Supplement: Supplementary file 1 [file 1]

## Supplemental Material S2. The script utilized to support the research team in administering teletraining session number two.

|                                         |                                         |                                                                                                                                                                                                                                                                                                                                                                                                                                                                                                                                                                                                                                                                                                                                          |                                                                                                                                                                                                                                                                                                                                                                                                                                                                                                                                                                                                                                                                                                                                                                                                                                                                                                                                                                                                                                                                                                                                                                                                                                                                                                                                  |
|-----------------------------------------|-----------------------------------------|------------------------------------------------------------------------------------------------------------------------------------------------------------------------------------------------------------------------------------------------------------------------------------------------------------------------------------------------------------------------------------------------------------------------------------------------------------------------------------------------------------------------------------------------------------------------------------------------------------------------------------------------------------------------------------------------------------------------------------------|----------------------------------------------------------------------------------------------------------------------------------------------------------------------------------------------------------------------------------------------------------------------------------------------------------------------------------------------------------------------------------------------------------------------------------------------------------------------------------------------------------------------------------------------------------------------------------------------------------------------------------------------------------------------------------------------------------------------------------------------------------------------------------------------------------------------------------------------------------------------------------------------------------------------------------------------------------------------------------------------------------------------------------------------------------------------------------------------------------------------------------------------------------------------------------------------------------------------------------------------------------------------------------------------------------------------------------|
| <b>Training 2 (Rxer + Para + Child)</b> | <b>Strategy demonstration review</b>    | <p>1. Explain format and learner objectives of session 2</p> <p>a. Practice strategy with child</p> <p>2. Introduce rxer to child</p>                                                                                                                                                                                                                                                                                                                                                                                                                                                                                                                                                                                                    | <p>1. Hi (para name). It is great to see you again! Thanks for making this time work for our second and last training session. Hopefully you had time to review the checklist from the email I sent.</p> <p>a. Today we will practice the steps with (student's name) and think about where and when you could use this checklist throughout the school day.</p> <p>2. Hi (student's name). I am working with (para's name) to think about ways to help you communicate during your school day. I am really happy to meet you!</p>                                                                                                                                                                                                                                                                                                                                                                                                                                                                                                                                                                                                                                                                                                                                                                                               |
|                                         | <b>Advanced practice &amp; feedback</b> | <p>1. Tell para to position the tablet/laptop so that both the para and child can be seen</p> <p>2. Tell para to practice the strategy in full with the target child</p> <p>3. Provide feedback based on para performance and child response (rxer will mark steps completed + feedback on hard copy checklist)</p> <p>a. Practice one time for rxer to provide general feedback about student response methods and step by step feedback on checklist</p> <p>4. Guide para to practice the strategy and provide feedback until criterion is met (80% of sub steps completed across 3 trials at least- 8/10 substeps)</p> <p>a. Provide specific feedback on what was correct, what to improve, and how child did or did not respond</p> | <p>1. First we need to make sure that I can see both of you in the camera while we practice. PARA POSITIONS CAMERA</p> <p>2. We are going to practice the steps from the checklist in full multiple times with (student's name). (Student's name), (Para's name) and I are working on learning ways to help you participate and communicate more during school. We want to know what you like, don't like, want, and think!</p> <p>3. Let's give this a try. Have you picked materials that are motivating and meaningful for (student's name)? Great! Ok, let's give this a try. PRACTICE ONE TIME. PROVIDE TIME FOR STUDENT TO PLAY WITH CHOSEN OBJECT.</p> <p>a. Way to go! (Para's name) you did.....(Student's name) chose/didn't choose and did that by .....You were able to comment on what you saw....Let's go through each step on the checklist and see what went well and where to improve.</p> <p>Step 1: You....Next time..</p> <p>Step 2: I noticed you...Let's try...</p> <p>Step 3: Great job with...</p> <p>Step 4: (student's name) did ____ and you responded by...</p> <p>4. We are going to try this a few more times. Use the checklist, remember to_____ and keep _____. (Student's name) it is so great to see what you like and want to play/read/make music with!</p> <p>a. Let's practice again.</p> |

|  |                   |                                                                                                                                                                                                                                                                                                                                                                                                                                                                                                                                                                                                                                                                    |                                                                                                                                                                                                                                                                                                                                                                                                                                                                                                                                                                                                                                                                                                                                                                                                                                                                                                                                                                                                                                                                                                                                                                                                                                                                                                                                                                                                                                                                                               |
|--|-------------------|--------------------------------------------------------------------------------------------------------------------------------------------------------------------------------------------------------------------------------------------------------------------------------------------------------------------------------------------------------------------------------------------------------------------------------------------------------------------------------------------------------------------------------------------------------------------------------------------------------------------------------------------------------------------|-----------------------------------------------------------------------------------------------------------------------------------------------------------------------------------------------------------------------------------------------------------------------------------------------------------------------------------------------------------------------------------------------------------------------------------------------------------------------------------------------------------------------------------------------------------------------------------------------------------------------------------------------------------------------------------------------------------------------------------------------------------------------------------------------------------------------------------------------------------------------------------------------------------------------------------------------------------------------------------------------------------------------------------------------------------------------------------------------------------------------------------------------------------------------------------------------------------------------------------------------------------------------------------------------------------------------------------------------------------------------------------------------------------------------------------------------------------------------------------------------|
|  | <b>Conclusion</b> | <p>1. Tell para that they have successfully completed the trainings</p> <p>2. Ask the paras the following questions to prompt for generalization:</p> <p>a. Situations/times/activities to implement checklist</p> <p>b. Data probes to be collected during which activity</p> <p>c. Generalization probes to be collected during which activity</p> <p>3. Tell para that you will continue to connect via Zoom to collect data on para implementation of the checklist and student responses</p> <p>4. Tell para thank you and that you are excited to see if this training will positively impact their student's opportunities to participate. Say goodbye.</p> | <p>1. You have worked through all the practice steps for this training.</p> <p>2. Before we end this session, I want to brainstorm ideas for when you could use this checklist throughout your school day.</p> <p>a. When in your school day are there potential opportunities for (student's name) to be offered choices (i.e., lunch, circle time, independent work stations, storybook activities, music, gym)?</p> <p>b. Which of these activities/situations occur every day and would be easiest for you to try the steps? Let's think back to the videos we collected prior to these trainings. We saw you offer (student's name) during....</p> <p>c. Which other activities/situations might these steps work for?</p> <p>3. If possible, it would be great if you could keep the hard copy of the checklist with you throughout the school day or when you are working with (student's name). I know for me that it is easier to remember to use something when I have that visual reminder. We will continue to Zoom to check how (student's name) responds to the steps in action.</p> <p>4. Thank you so much for meeting with me to learn these steps. I hope they allow (student's name) to communication and participate more throughout the school day. You have done a great job practicing the steps during our sessions. We will connect over Zoom next on (date) at (time) for 5-10 minutes to see how it goes. Thank you (student's name)! Thank you (para's name)!</p> |
|--|-------------------|--------------------------------------------------------------------------------------------------------------------------------------------------------------------------------------------------------------------------------------------------------------------------------------------------------------------------------------------------------------------------------------------------------------------------------------------------------------------------------------------------------------------------------------------------------------------------------------------------------------------------------------------------------------------|-----------------------------------------------------------------------------------------------------------------------------------------------------------------------------------------------------------------------------------------------------------------------------------------------------------------------------------------------------------------------------------------------------------------------------------------------------------------------------------------------------------------------------------------------------------------------------------------------------------------------------------------------------------------------------------------------------------------------------------------------------------------------------------------------------------------------------------------------------------------------------------------------------------------------------------------------------------------------------------------------------------------------------------------------------------------------------------------------------------------------------------------------------------------------------------------------------------------------------------------------------------------------------------------------------------------------------------------------------------------------------------------------------------------------------------------------------------------------------------------------|
