# Supplementary material
Source: publisher figshare collection journal article supplement (https://asha.figshare.com/articles/dataset/_/28108139)
Supplement: Supplementary file 2 [file 1]

### Supplemental Material S3. Social Validity - Communication Partners.

Please answer the following questions about the "Offering opportunities to communicate choices" training.

For each of the statements below, rate your level of agreement (1= strongly disagree, 2= disagree, 3=neutral, 4=agree, 5=strongly agree).

|                                                                        | 1 | 2 | 3 | 4 | 5 |
|------------------------------------------------------------------------|---|---|---|---|---|
| The training was useful.                                               |   |   |   |   |   |
| I will use this strategy with my student.                              |   |   |   |   |   |
| I would recommend this training to other adult communication partners. |   |   |   |   |   |
| I would consider teaching this strategy to peers of the student.       |   |   |   |   |   |
| Video calling was an effective way to participate in the training.     |   |   |   |   |   |
| I will use the paper checklist to implement the strategy.              |   |   |   |   |   |
| Role play was an effective way to practice the strategy.               |   |   |   |   |   |

1. If you found the training to be useful, what were some of the benefits? If not, why not?
2. What did you like best about the training?
3. What would you change about the training?
4. When do you plan to use this strategy with your student? If not, why not?
5. Any other comments?
